# Supplementary material for: Hydroxyurea promotes TET1 expression and induces apoptosis in osteosarcoma cells
Source: Oxford University Press journal article supplement (doi:10.1042/bsr20190456), 2019-04-15
Supplement: bsr-2019-0456_supp.pdf [file bsr-2019-0456_supp.pdf]

**Table**

Table S1 Primers for si-RNA analysis

| siRNA   | Target sequence     |
|---------|---------------------|
| si-TET1 | GCACGCATGAATTTGGATA |

Table S2 Primers for qRT-PCR analysis

| Genes        | Annealing<br>(°C) | Primer sequences (5'→3')                               | Referenc<br>e/accessi<br>on |
|--------------|-------------------|--------------------------------------------------------|-----------------------------|
| <i>TET1</i>  | 60                | F: CAGAACCTAAACCACCCGTG<br>R: TGCTTCGTAGCGCCATTGTAA    | (Yang et<br>al., 2015)      |
| <i>TET2</i>  | 60                | F: GATAGAACCAACCATGTTGAGGG<br>R: TGGAGCTTTGTAGCCAGAGGT | (Yang et<br>al., 2015)      |
| <i>TET3</i>  | 60                | F: TCCAGCAACTCCTAGAACTGAG<br>R: AGGCCGCTTGAATACTGACTG  | (Yang et<br>al., 2015)      |
| <i>GAPDH</i> | 60                | F: TGGTATCGTGGAAGGACTCA<br>R: GGGCCATCGACAGTCTTC       | J02642.1                    |
